# Supplementary material for: Hepatic parenchymal cell and mitochondrial-targeted astaxanthin nanocarriers for relief of high fat diet-induced nonalcoholic fatty liver disease
Source: Royal Society of Chemistry journal article supplement (doi:10.1039/d2fo04036k), 2023-01-01
Supplement: d2fo04036k1.pdf [file d2fo04036k1.pdf]

**Hepatic parenchymal cell and mitochondrial-targeted astaxanthin nanocarriers  
for relief of high fat diet-induced nonalcoholic fatty liver disease**

Tongtong Che<sup>abc</sup>, Yukun Song<sup>abc\*</sup>, Wentao Su<sup>abc</sup>, Shanghua Xing<sup>abc</sup>, Haitao Wang<sup>abc</sup>,  
Mingqian Tan<sup>abc</sup>

<sup>a</sup>Academy of Food Interdisciplinary Science, School of Food Science and Technology,  
Dalian Polytechnic University, Qinggongyuan1, Ganjingzi District, Dalian 116034,  
Liaoning, China

<sup>b</sup>National Engineering Research Center of Seafood, Dalian Polytechnic University,  
Dalian 116034, Liaoning, China

<sup>c</sup>Collaborative Innovation Center of Seafood Deep Processing, Dalian Polytechnic  
University, Dalian116034, Liaoning, China

\* To the correspondence

Name: Yukun Song

E-mail: songyukun@dlpu.edu.cn

Correspondence address: Academy of Food Interdisciplinary Science, School of Food  
Science and Technology, Dalian Polytechnic University, Qinggongyuan1, Ganjingzi  
District, Dalian 116034, Liaoning, China

Tel &Fax: +86-0411-86318657

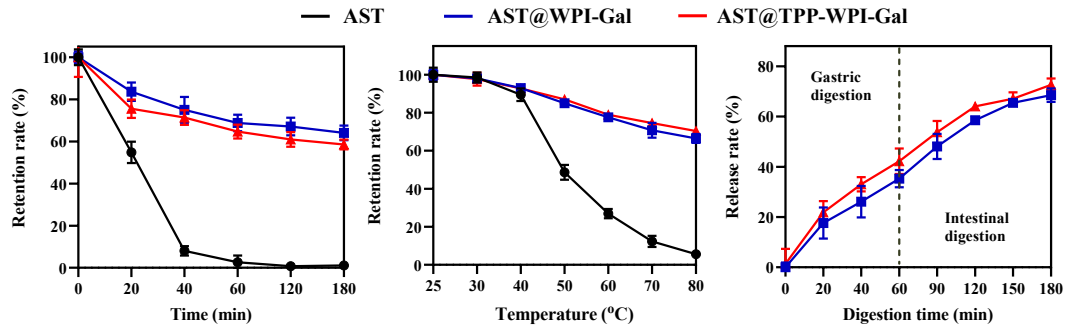

Figure S1 Stability of AST, AST@WPI-Gal and AST@TPP-WPI-Gal nanocarriers under the UV irradiation, different temperatures and gastrointestinal digestion.

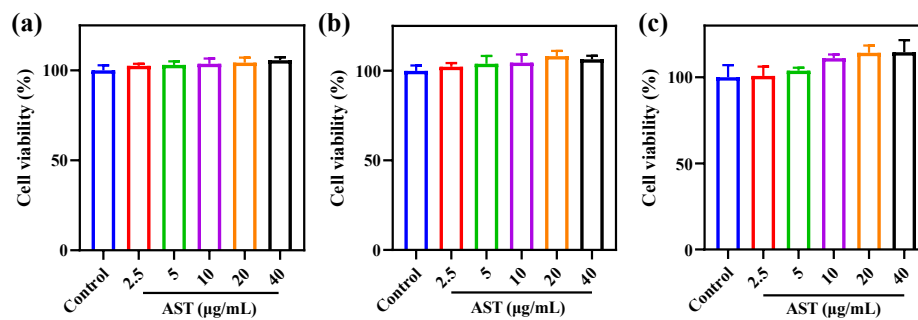

Figure S2. Cell viability analysis for the HepG2 cells incubated with (a) free AST, (b) AST@WPI-Gal and (c) AST@TPP-WPI-Gal.

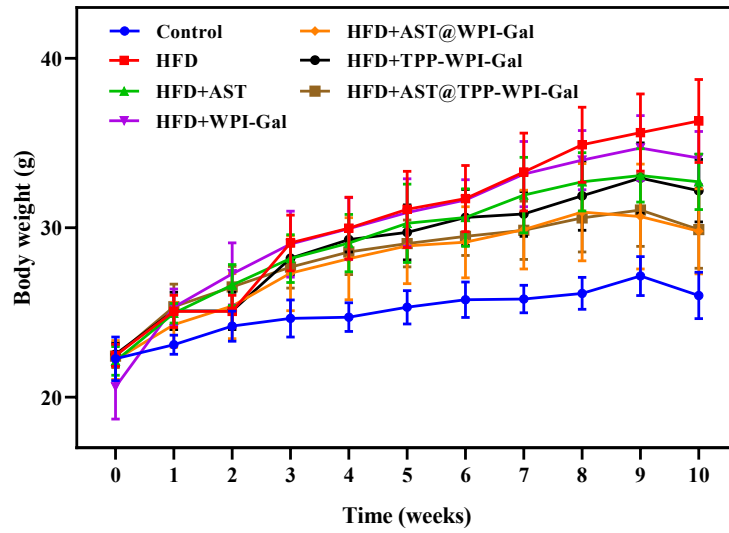

Figure S3 Body weight changes of mice during 6 weeks of different treatments (n=10/group): Control, HFD, HFD+free AST, HFD+WPI-Gal, HFD+AST@WPI-Gal, HFD+TPP-WPI-Gal and HFD+AST@TPP-WPI-Gal nanoparticles.

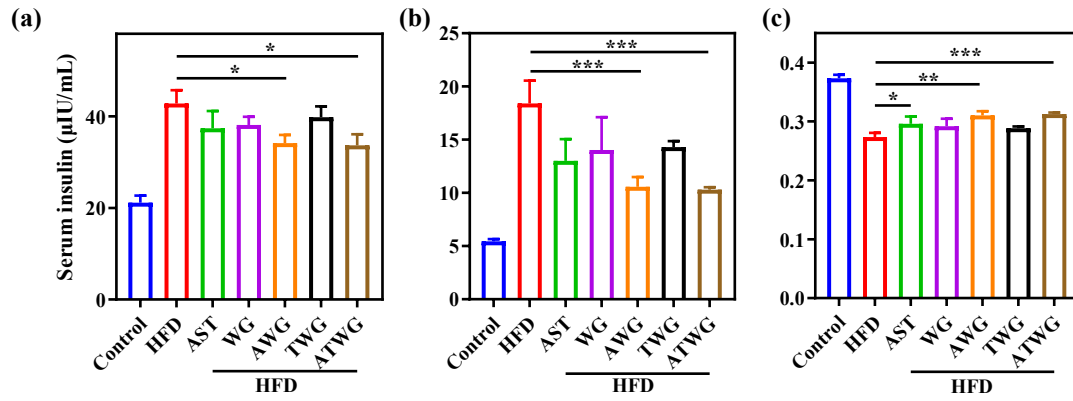

Figure S4 Determination of serum (a) insulin, (b) homeostatic model assessment of insulin resistance and (c) quantitative insulin sensitivity check index levels after 6 weeks of different treatments (n=10/group). WG: WPI-Gal, AWG: AST@WPI-Gal, TWG: TPP-WPI-Gal, ATWG: AST@TPP-WPI-Gal.

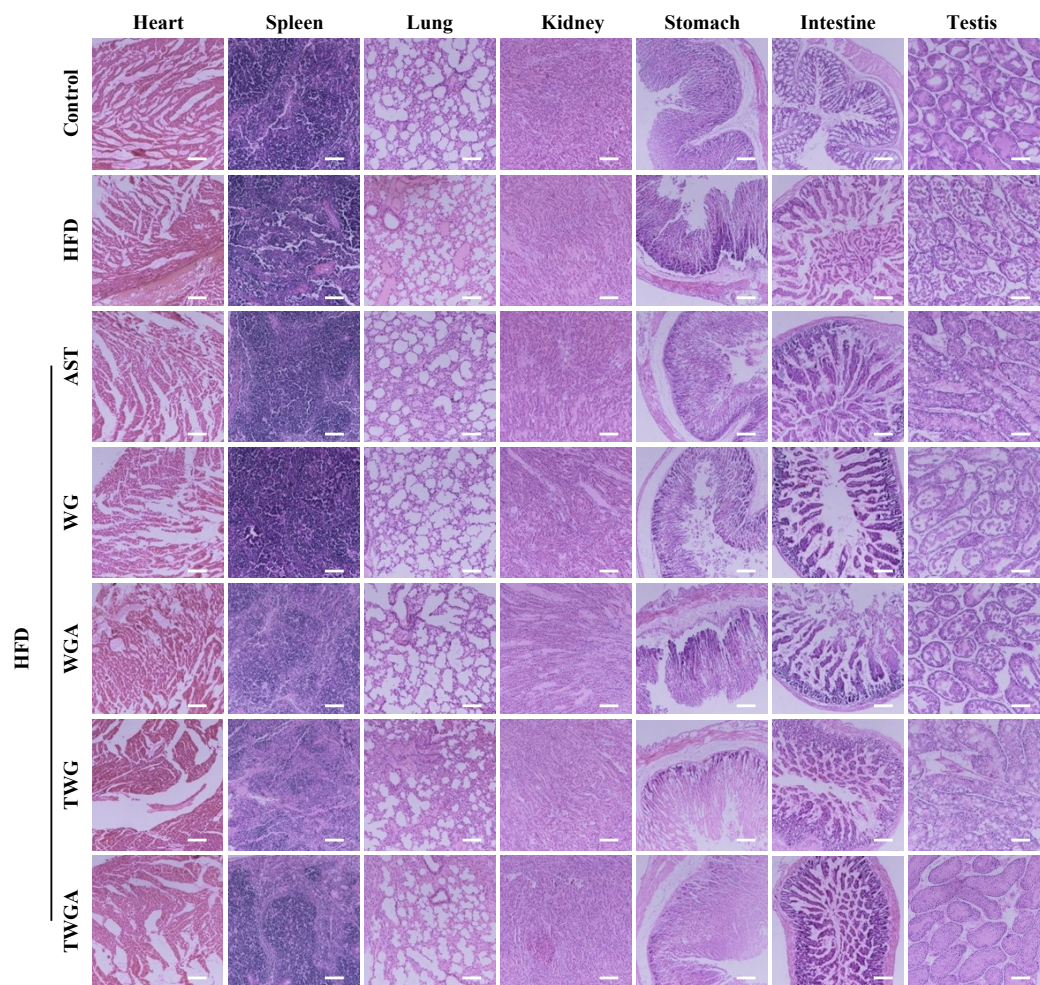

Figure S5 Histopathological images of heart, spleen, lung, kidney, stomach, intestine and testis sections staining of mice under different treatments for 6 weeks. Scale bar: 400  $\mu$ m. WG: WPI-Gal, AWG: AST@WPI-Gal, TWG: TPP-WPI-Gal, ATWG: AST@TPP-WPI-Gal.
